# Supplementary material
Source: Springer Nature journal article supplement (https://www.springermedizin.de/resource/supplementary/12885_2014_4817_MOESM6_ESM.pdf/9467446)

**A** Sample 29 (68 clones) (cluster 1)

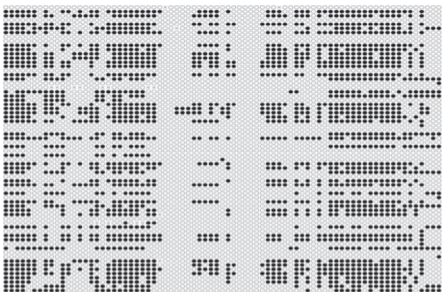

**B** Sample 46 (61 clones) (cluster 2)

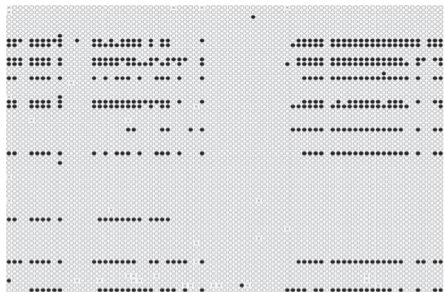

**C** Sample 10 (77 clones) (cluster 3)

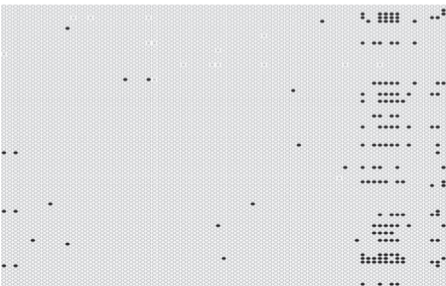

**D** Sample 31 (57 clones) (cluster 4)

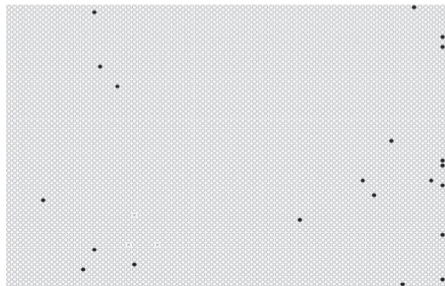

Supplement: MOESM6 [file 9467446]
